# Supplementary material for: Preparation of a Bi6O5(OH)3(NO3)5·2H2O/AgBr composite and its long-lasting antibacterial efficacy
Source: Royal Society of Chemistry journal article supplement (doi:10.1039/d2ra07447h), 2023-01-01

Fig. S1. TEM image in high magnification of AgBr nanoparticles

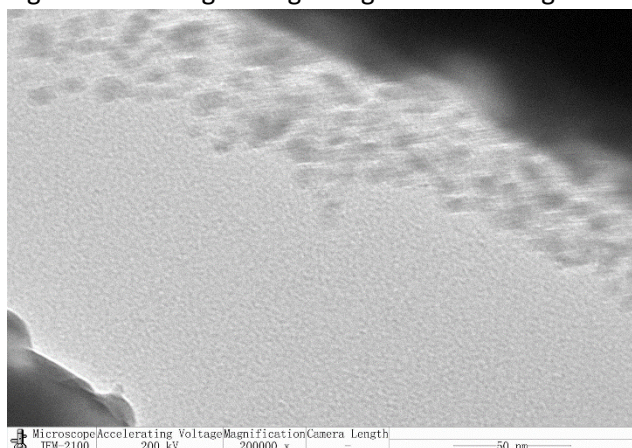

Fig. S2. SEM image of BBN nanosheets

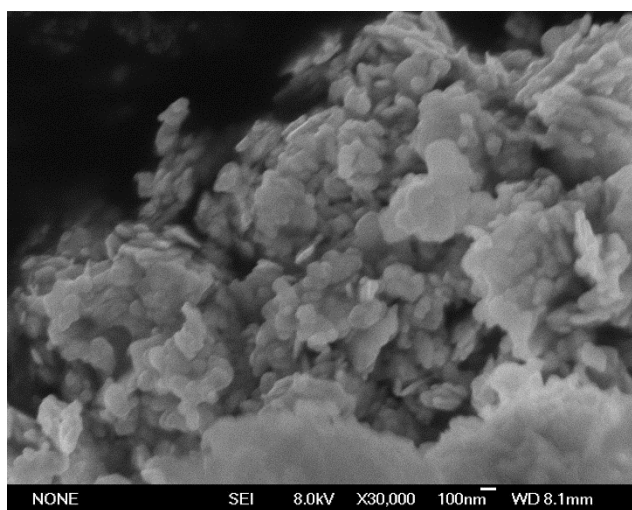

Fig. S3. FTIR spectrum of pure AgBr

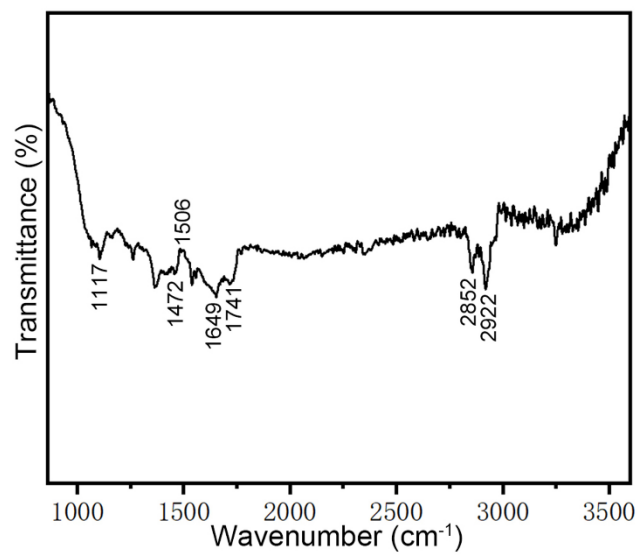

Fig. S4. SEM image AgBr nanoparticles

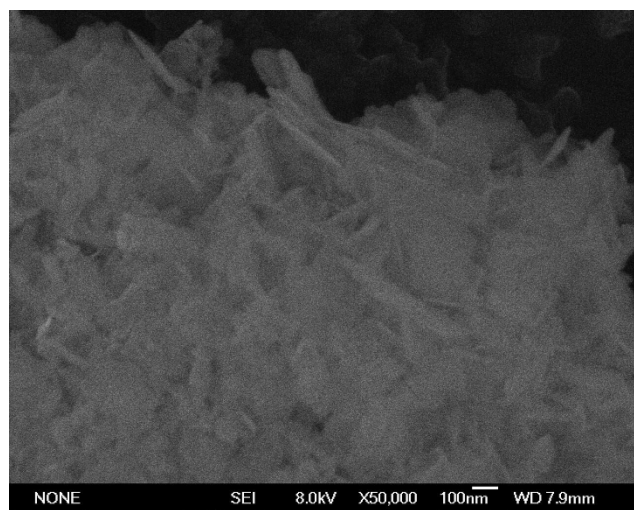

Supplement: d2ra07447h1.pdf [file d2ra07447h1.pdf]
